# Limb-shaking transient ischaemic attacks in patients with internal carotid artery occlusion: a case-control study

Suzanne Persoon, L. Jaap Kappelle and Catharina J. M. Klijn

Department of Neurology, Rudolf Magnus Institute of Neuroscience, University Medical Centre Utrecht, Utrecht, The Netherlands

Correspondence to: Suzanne Persoon, MD  
Department of Neurology,  
University Medical Centre Utrecht,  
G03.228,  
Heidelberglaan 100,  
3584 CX Utrecht, The Netherlands  
E-mail: s.persoon@umcutrecht.nl

Limb-shaking is a specific clinical feature of transient ischaemic attacks that has been associated with a high-grade stenosis or occlusion of the internal carotid artery. The aim of this study was to describe the clinical characteristics of limb-shaking in patients with internal carotid artery occlusion and to investigate whether patients with limb-shaking have a worse haemodynamic state of the brain than patients with internal carotid artery occlusion without limb-shaking. We included 34 patients (mean age  $62 \pm 7$  years, 82% male) with limb-shaking associated with internal carotid artery occlusion and 68 sex- and age-matched controls with cerebral transient ischaemic attack or minor disabling ischaemic stroke associated with internal carotid artery occlusion, but without limb-shaking. We investigated clinical characteristics, collateral pathways on contrast angiograms and carbon dioxide-reactivity measured by transcranial Doppler. The results showed that limb-shaking usually lasted less than 5 min and was often accompanied by paresis of the involved limb. Compared with controls, patients with limb-shaking more frequently had symptoms precipitated by rising or exercise (odds ratio 14.2, 95% confidence interval 4.2–47.9), more frequently had recurrent ischaemic deficits after documented internal carotid artery occlusion (but before inclusion in the study) (odds ratio 8.2, 95% confidence interval 2.3–29.3), more often had leptomeningeal collaterals (odds ratio 6.8, 95% confidence interval 2.0–22.7), and tended to have a lower carbon dioxide-reactivity (mean  $5\% \pm 16$  versus  $12\% \pm 17$ ; odds ratio 0.97 per 1% increase in carbon dioxide-reactivity, 95% confidence interval 0.94–1.00). In conclusion, limb-shaking transient ischaemic attacks in patients with internal carotid artery occlusion can be recognized by their short duration, are often accompanied by paresis and precipitated by rising or exercise and are indicative of an impaired haemodynamic state of the brain.

**Keywords:** transient ischaemic attack; stroke; carotid artery diseases; haemodynamics

**Abbreviations:** EC/IC = extracranial/intracranial; ICA = internal carotid artery; MCA = middle cerebral artery; TCD = transcranial Doppler; TIA = transient ischaemic attack

## Introduction

Several case reports have described limb-shaking as a rare clinical feature of transient ischaemic attacks (TIAs) (Firlik *et al.*, 1996; Leira *et al.*, 1997; Niehaus *et al.*, 1998; Zaidat *et al.*, 1999; Klempen *et al.*, 2002; Schulz and Rothwell, 2002; Cheshire and Meschia, 2006; Kiechl *et al.*, 2007). Limb-shaking has been characterized by brief, jerky, coarse, involuntary movements involving an arm or leg (Fisher, 1962; Baquis *et al.*, 1985) and has been associated with high-grade stenosis or occlusion of the internal carotid artery (ICA). Small observational studies have shown impaired cerebral blood flow or cerebrovascular reserve capacity in patients with limb-shaking and ICA stenosis or occlusion in comparison with normal controls (Yanagihara *et al.*, 1985; Levine *et al.*, 1989; Tatemichi *et al.*, 1990; Firlik *et al.*, 1996; Baumgartner and Baumgartner, 1998). Whether patients with ICA stenosis or occlusion with limb-shaking have a worse flow state of the brain than patients with ICA stenosis or occlusion without limb-shaking is unknown. Since the large extracranial–intracranial (EC/IC) bypass trial showed no benefit of EC/IC bypass surgery for prevention of stroke in patients with an ICA occlusion (The EC/IC Bypass Study Group, 1985), several studies have suggested that EC/IC bypass surgery may be of benefit in a subgroup of patients with impaired cerebral perfusion (Grubb *et al.*, 1998; Garrett *et al.*, 2009). In that perspective, it may be important to recognize limb-shaking on the basis of the history and to investigate whether this specific subtype of TIA is associated with haemodynamic impairment. The purpose of this study was to describe the clinical characteristics of limb-shaking in patients with TIA or moderately disabling stroke associated with an occlusion of the ICA and to investigate whether patients with limb-shaking have a worse haemodynamic state of the brain than patients with symptomatic ICA occlusion without limb-shaking.

## Materials and methods

### Patients

Between 1995 and 2008 we collected data from 313 patients with TIA or minor ischaemic stroke with, at most, moderately disabling cerebral or retinal ischaemic symptoms (modified Rankin scale  $\leq 3$ ) (Banks and Marotta, 2007) associated with ICA occlusion, who were referred to the Department of Neurology, University Medical Centre Utrecht, The Netherlands. All patients had been symptomatic in the 6 months prior to the time of referral. Data, including the presence of limb-shaking, had been collected prospectively by two vascular neurologists (L.J.K. and C.J.M.K.). Limb-shaking was defined as brief, jerky, coarse, involuntary movements of an arm or leg or both (Baquis *et al.*, 1985). All patients were specifically asked for these symptoms of limb-shaking, and if present they were interviewed in detail about the duration, frequency and location of the limb-shaking, the presence of weakness accompanying the limb-shaking, and for precipitating factors such as rising, exercise, coughing, a meal, hyperextension of the neck, transition from a cold to warm environment or taking anti-hypertensive medication. In addition, we documented whether additional cerebral or retinal ischaemic symptoms (retinal infarction or transient monocular blindness) were present.

The protocol for the current study was prepared after collection of all data, but before the analysis was performed. For each patient with limb-shaking we randomly selected two controls, matched for sex and age, who had presented during the same period with cerebral TIA (lasting  $< 24$  h) or moderately disabling ischaemic stroke (modified Rankin scale  $\leq 3$ ) associated with ICA occlusion, but who had not reported limb-shaking. The ICA occlusion was demonstrated by the absence of filling of the ICA by contrast angiography, or in one patient by absence of flow in the ICA on magnetic resonance angiography. The degree of an additional stenosis in the contralateral ICA, ipsilateral external carotid artery or vertebral artery was measured according to the North American Symptomatic Carotid Endarterectomy Trial criteria (Fox, 1993). Patients with an ICA occlusion caused by a dissection or a radiation-vasculopathy were not included. In patients and controls, we investigated the presence of vascular risk factors as listed in Table 2. The mean arterial blood pressure was calculated by two times the diastolic pressure plus the systolic pressure divided by 3, and expressed in mmHg. All patients underwent MRI or CT of the brain to investigate the presence of a symptomatic infarct. Infarcts were considered symptomatic if the location corresponded with the patients' symptoms and were classified as territorial, watershed, large subcortical or lacunar (diameter  $\leq 15$  mm) (Damasio, 1983).

### Collateral blood flow

Patients had contrast angiography to confirm the ICA occlusion and to visualize the collateral blood flow patterns. Collateral blood flow pathways were studied for the symptomatic hemisphere. We considered collateral blood flow via the ophthalmic artery as present if selective catheterization of the common carotid artery showed filling of intracranial arteries distal to the carotid siphon via the external carotid artery. Collateral pathways via the anterior communicating artery or the posterior communicating artery were considered present if these collateral pathways showed filling of the anterior or middle cerebral artery (MCA) branches ipsilateral to the symptomatic ICA occlusion. Leptomeningeal collaterals were considered present if pial branches from the posterior cerebral artery extending as far as the vascular territory of the MCA or anterior cerebral artery (beyond the usual posterior cerebral artery territory) were visualized on the angiogram after selective catheterization of one of the vertebral arteries (Fig. 1) (Brozici *et al.*, 2003).

### Transcranial Doppler CO<sub>2</sub>-reactivity

Transcranial Doppler (TCD) was performed with measurement of the CO<sub>2</sub>-reactivity to investigate cerebrovascular reserve capacity. Details of this protocol have been described before (Klijn *et al.*, 2000). The CO<sub>2</sub>-reactivity after carbogène inhalation was the relative change in blood flow velocity in the MCA and expressed as a percentage. A CO<sub>2</sub>-reactivity of  $< 20\%$  was considered abnormal, since this value corresponds with the mean CO<sub>2</sub>-reactivity minus two times the standard deviation (SD) in normal controls (Klijn *et al.*, 2001).

### Data analysis

We compared clinical characteristics, vascular risk factors, the presence and type of cerebral infarcts, the presence of a stenosis or occlusion in the contralateral ICA, external carotid artery or vertebral arteries, collateral blood flow pathways, and CO<sub>2</sub>-reactivity between patients with and without limb-shaking and expressed differences as odds ratios (ORs) with 95% confidence intervals (CIs). In a subgroup-analysis, patients with limb-shaking TIAs were compared with control patients

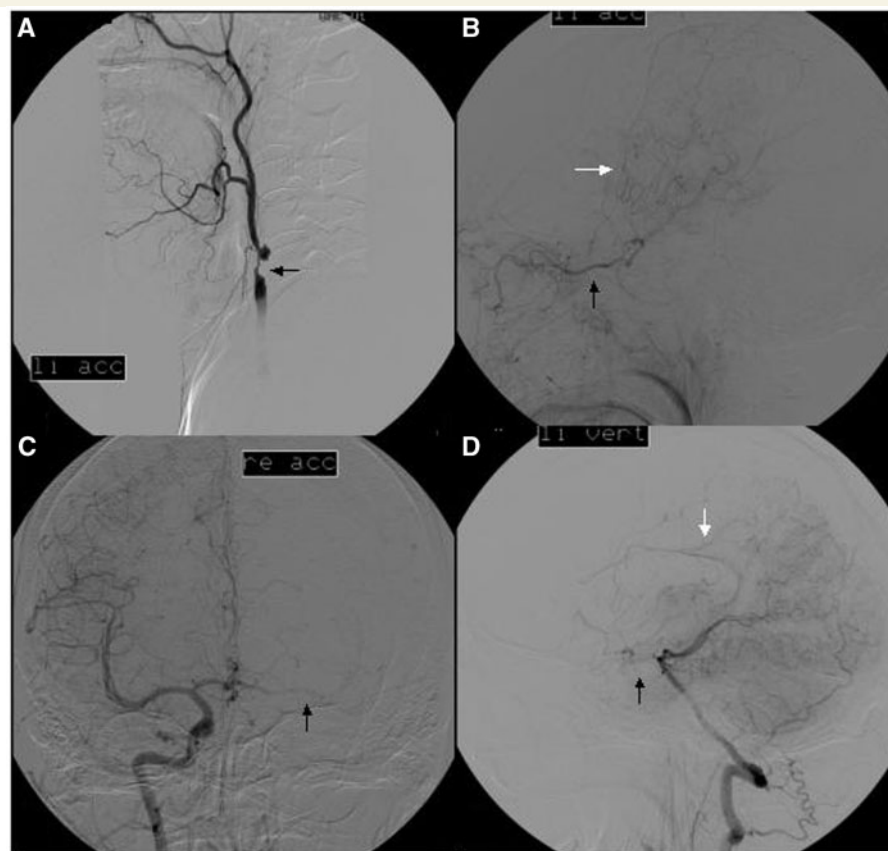

**Figure 1** Angiogram of a 57-year-old patient with a left ICA occlusion and almost daily limb-shaking TIAs from the left hemisphere; (A) left ICA occlusion and severe stenosis of the ipsilateral common carotid artery (black arrow), (B) selective catheterization of the left common carotid artery shows filling of MCA branches (white arrow) via the ophthalmic artery (black arrow) in the left hemisphere; (C) selective catheterization of the right common carotid artery shows limited filling of MCA branches (black arrow) via the anterior communicating artery, (D) selective catheterization of the left vertebral artery shows filling of some MCA branches via the posterior communicating artery (black arrow) and filling of leptomeningeal collateral vessels (white arrow), originating from the posterior cerebral artery.

with TIAs without limb-shaking (excluding control patients with ischaemic stroke). We used logistic regression analysis to study the effect of the time interval between the patient's last ischaemic symptoms and the CO<sub>2</sub>-reactivity measurement on the association between limb-shaking TIAs and CO<sub>2</sub>-reactivity and expressed this adjusted association as OR per 1% increase in CO<sub>2</sub>-reactivity. Finally, we assessed the relationship between CO<sub>2</sub>-reactivity and leptomeningeal collaterals by a multivariable regression model. The study was approved by the institutional review board of the University Medical Centre Utrecht.

## Results

Of the 313 patients with symptomatic ICA occlusion, 34 (11%) reported limb-shaking. The characteristics of limb-shaking are shown in Table 1. The duration of limb-shaking was shorter than 5 min in the majority of patients. Most patients reported multiple episodes of limb-shaking. The arm was more frequently involved than the leg. In almost one-third of patients the arm and leg shook simultaneously. Most patients demonstrated shaking of their whole limb and not just the hand or foot. During or following

limb-shaking, 28 (82%) of the 34 patients noticed a transient paresis of their arm or leg. In 14 (41%) patients, limb-shaking occurred subsequent to precipitating factors such as rising, exercise or coughing (Table 1). Table 2 shows the characteristics of the patients with limb-shaking and of controls. The presence of vascular risk factors was similar in patients with limb-shaking and controls, except for a history of hypertension that we found more often in patients with, than in those without, limb-shaking TIAs (OR 4.3, 95% CI 1.5–12.5). All patients with limb-shaking also reported symptoms other than limb-shaking; 27 (79%) patients had additional TIAs without limb-shaking (reported symptoms, isolated or combined, were paresis of a limb in 24, sensory symptoms in 12, dysphasia in 6 and dysarthria in 2 patients), and seven (21%) patients had additional permanent deficit caused by a minor ischaemic stroke characterized by isolated or combined symptoms of paresis of a limb in six, sensory symptoms in one, and dysphasia in four patients. In the control group, 22 (32%) patients had presented with cerebral TIA and 46 (68%) patients with ischaemic stroke. Compared with controls, patients with limb-shaking more frequently presented with TIAs than with ischaemic stroke (OR 8.1, 95% CI 3.0–21.4), and more

**Table 1** Clinical characteristics of limb-shaking events among 34 patients with occlusion of the ICA

|                                                            | Number of cases |
|------------------------------------------------------------|-----------------|
| Duration                                                   |                 |
| <1 min                                                     | 13              |
| 1–5 min                                                    | 15              |
| >5 min                                                     | 3               |
| Unknown                                                    | 3               |
| Frequency of limb-shaking TIAs                             |                 |
| 1 episode                                                  | 5               |
| 2–5 episodes in a month                                    | 18              |
| >5 episodes in a month                                     | 11              |
| Side of limb-shaking                                       |                 |
| Right                                                      | 21              |
| Left                                                       | 13              |
| Location                                                   |                 |
| Arm only                                                   | 15              |
| Leg only                                                   | 5               |
| Arm and leg together                                       | 9               |
| Sometimes arm only, sometimes leg only, sometimes together | 5               |
| Part of the arm                                            |                 |
| Whole arm                                                  | 25              |
| Lower arm and hand                                         | 2               |
| Hand only                                                  | 2               |
| Part of the leg                                            |                 |
| Whole leg                                                  | 19              |
| Only foot                                                  | 0               |
| Strength during or following limb-shaking                  |                 |
| Paresis                                                    | 28              |
| Normal strength                                            | 2               |
| Unknown                                                    | 4               |
| Precipitating factors <sup>a</sup>                         | 14              |
| Rising                                                     | 8               |
| Hyperextension of neck                                     | 1               |
| Transition from cold to warm environment                   | 1               |
| Exercise                                                   | 5               |
| Meal                                                       | 0               |
| Coughing                                                   | 4               |
| Recent start of antihypertensive medication                | 1               |

a Precipitating factors were present in 14 patients. Four patients had two and one patient had three precipitating factors.

often had additional retinal ischaemic symptoms (OR 3.6, 95% CI 1.2–10.6). Precipitating factors that may compromise cerebral perfusion, such as rising or exercise, were more often—but not always—present in patients with limb-shaking than in controls (OR 14.2, 95% CI 4.2–47.9). Patients with limb-shaking TIAs more frequently had recurrent ischaemic deficits after documented ICA occlusion (but before inclusion in the study) than control patients without limb-shaking (OR 8.2, 95% CI 2.3–29.3). Patients with limb-shaking less often had an infarct on their MRI or CT compared to controls (OR 0.2, 95% CI 0.1–0.6) and more often a stenosis or occlusion in one of the vertebral arteries (OR 4.0, 95% CI 1.5–10.4). Patients with limb-shaking were seven times more often dependent on leptomeningeal collaterals than controls (OR 6.8, 95% CI 2.0–22.7, Table 3). We found a CO<sub>2</sub>-reactivity

<20% ipsilateral to the ICA occlusion in 24 (83%) patients with limb-shaking and in 43 (68%) patients without limb-shaking (OR 2.2, 95% CI 0.7–6.7). On average, CO<sub>2</sub>-reactivity in patients with limb-shaking (mean 5% ± 16) tended to be lower than in those without limb-shaking (mean 12% ± 17; OR 0.97 per 1% increase in CO<sub>2</sub>-reactivity, 95% CI 0.94–1.00). The median time interval between the most recent symptom and the CO<sub>2</sub>-reactivity measurement was 18 (range 0–140) days in patients with limb-shaking and 57 (range 0–206) days in patients without limb-shaking. After adjustment of the OR for this time interval, the finding of a lower CO<sub>2</sub>-reactivity in patients with limb-shaking TIAs lost significance in comparison with controls (adjusted OR 0.98 per 1% increase in CO<sub>2</sub>-reactivity, 95% CI 0.95–1.01).

In the subgroup analysis of patients with limb-shaking TIAs in comparison with control patients with TIAs without limb-shaking (excluding control patients with ischaemic stroke) leptomeningeal collaterals were more frequent in patients with limb-shaking (21 of 25, 84%) compared with patients without limb-shaking (6 of 16, 38%; OR 8.8, 95% CI 2.0–38.1). The mean CO<sub>2</sub>-reactivity in patients with limb-shaking TIAs was significantly lower than the mean CO<sub>2</sub>-reactivity in patients with TIAs without limb-shaking (5% ± 16 versus 17% ± 18; OR 0.96 per 1% increase in CO<sub>2</sub>-reactivity, 95% CI 0.92–0.99). Also in this subgroup analysis, the association between limb-shaking and a low CO<sub>2</sub>-reactivity was dependent on the time interval (adjusted OR 0.96 per 1% increase in CO<sub>2</sub>-reactivity, 95% CI 0.93–1.00).

In a multivariable analysis including the factors leptomeningeal collaterals and CO<sub>2</sub>-reactivity, the significant relationship between leptomeningeal collaterals and limb-shaking (OR 7.0, 95% CI 1.7–28.4) remained, as well as the trend for a lower CO<sub>2</sub>-reactivity in patients with than in those without limb-shaking (OR 0.96 per 1% increase in CO<sub>2</sub>-reactivity, 95% CI 0.92–1.00). This trend was no longer apparent after adjustment for the time interval between the last symptoms and TCD (adjusted OR 0.97 per 1% increase in CO<sub>2</sub>-reactivity, 95% CI 0.92–1.01).

## Discussion

This study shows that limb-shaking in patients with ICA occlusion usually lasts less than 5 min, is often accompanied by paresis of the involved limb and is often, but not necessarily precipitated by activities that may compromise cerebral perfusion such as rising, exercise or coughing. In comparison with patients with ICA occlusion without limb-shaking, patients with limb-shaking are about seven times more often dependent on leptomeningeal collaterals and tended to have a lower CO<sub>2</sub>-reactivity. Compared with controls with TIAs without limb-shaking and no ischaemic stroke, the patients with limb-shaking TIAs had a significantly lower mean CO<sub>2</sub>-reactivity. The time period between the last symptoms and the CO<sub>2</sub>-reactivity measurement was shorter in patients with than in patients without limb-shaking, probably because patients with limb-shaking TIAs more frequently had recurrent ischaemic deficits after documentation of the ICA occlusion, which contributed to their relatively low CO<sub>2</sub>-reactivity.



**Table 2** Characteristics of patients with symptomatic ICA occlusion with (*n* = 34) and without (*n* = 68) limb-shaking, matched for age and sex

|                                                      | Limb-shaking group ( <i>n</i> = 34) | Control group ( <i>n</i> = 68) |
|------------------------------------------------------|-------------------------------------|--------------------------------|
| Mean age (years ± SD)                                | 62 ± 7.6                            | 62 ± 7.3                       |
| Male                                                 | 28 (82%)                            | 56 (82%)                       |
| Cigarette smoking in the last 5 years                | 29 (85%)                            | 49 (72%)                       |
| Hypertension <sup>a</sup>                            | 29 (85%) <sup>b</sup>               | 39 (57%)                       |
| Hyperlipidaemia <sup>c</sup>                         | 30 (88%)                            | 60 (88%)                       |
| Diabetes mellitus                                    | 6 (18%)                             | 17 (25%)                       |
| History of ischaemic stroke (>6 months ago)          | 7 (21%)                             | 11 (16%)                       |
| History of ischaemic heart disease                   | 9 (27%)                             | 19 (28%)                       |
| History of peripheral vascular disease               | 14 (41%)                            | 23 (34%)                       |
| History of vascular disease in first-degree relative | 26 (77%)                            | 43 (63%)                       |
| <b>Clinical features</b>                             |                                     |                                |
| Cerebral TIA without limb-shaking                    | 27 (79%) <sup>b</sup>               | 22 (32%)                       |
| Ischaemic stroke                                     | 7 (21%)                             | 46 (68%)                       |
| Additional retinal ischaemic symptoms                | 10 (29%) <sup>b</sup>               | 7 (10%)                        |
| Ischaemic symptoms after documented occlusion        | 31 (91%) <sup>b</sup>               | 38 (56%)                       |
| Precipitating factors <sup>d</sup>                   | 16 (47%) <sup>b</sup>               | 4 (6%)                         |
| Mean arterial pressure (mmHg ± SD)                   | 112 ± 15                            | 116 ± 16                       |
| <b>Infarcts</b>                                      |                                     |                                |
| Symptomatic infarct <sup>e</sup>                     | 16/33 (48%) <sup>b</sup>            | 54/68 (79%)                    |
| Territorial                                          | 3 (19%)                             | 19 (35%)                       |
| Watershed, cortical                                  | 6 (38%)                             | 19 (35%)                       |
| Watershed, deep                                      | 0 (0%)                              | 2 (4%)                         |
| Large subcortical                                    | 3 (19%)                             | 5 (9%)                         |
| Lacunar                                              | 4 (25%)                             | 9 (17%)                        |
| <b>Cerebroretal arteries</b>                         |                                     |                                |
| Contralateral ICA occlusion                          | 5/34 (15%)                          | 12/68 (18%)                    |
| Contralateral ICA stenosis 50–99%                    | 7/34 (21%)                          | 27/68 (40%)                    |
| Stenosis ≥50% or occlusion ipsilateral of ECA        | 6/33 (18%)                          | 8/67 (12%)                     |
| Stenosis ≥50% or occlusion of vertebral artery       | 15/27 (56%) <sup>b</sup>            | 15/63 (24%)                    |

a Defined as a blood pressure >160/95 mmHg or the current use of anti-hypertensive medication.

b Comparison patients with and without limb-shaking, *P* < 0.05.

c Defined as patients with either a history of hyperlipidaemia, patients on drugs because of hyperlipidaemia or patients with levels of cholesterol, triglycerides, or high density lipoprotein cholesterol beyond the normal ranges.

d In 14 patients the limb-shaking was precipitated by activities that may compromise cerebral perfusion, in two patients only additional TIAs without limb-shaking were precipitated by rising. In the control-group symptoms were precipitated by rising in two patients and by exercise in two patients.

e 94 patients had an MRI scan of their brain, seven patients a CT scan and in one patient a recent CT or MRI scan could not be performed.

ECA = external carotid artery.

Compared with previous small case series of 5–12 patients (Baquis *et al.*, 1985; Yanagihara *et al.*, 1985; Baumgartner and Baumgartner, 1998), we were able to identify a relatively large group of patients with limb-shaking. We confirmed that limb-shaking TIAs occur in about 10% of patients with occlusion of the ICA (Bogousslavsky and Regli, 1986). The underlying mechanism of limb-shaking is unclear, but most studies suggest that the shaking movements are caused by transient focal cerebral ischaemia (Baquis *et al.*, 1985; Yanagihara *et al.*, 1985; Tatemichi *et al.*, 1990; Firlirk *et al.*, 1996; Baumgartner and Baumgartner, 1998; Salah Uddin, 2004). Limb-shaking TIAs may resemble epileptic seizures but can be distinguished by a normal level of consciousness, precipitation of symptoms by specific circumstances that may lower cerebral blood flow in patients with ICA occlusion, such as rising or exercise, the absence of tonic contractions or a march of symptoms, no involvement of the face or trunk, and no epileptic discharges on an EEG (Yanagihara *et al.*, 1985; Baumgartner and Baumgartner, 1998; Schulz and Rothwell, 2002). Various other

hyperkinetic movements such as hemidystonia and hemichorea-hemiballism have also been described in relation to TIA or stroke (Ghika-Schmid *et al.*, 1997; Shimizu *et al.*, 2001; Kim, 2001; Salah Uddin, 2004), but they are exceedingly rare with a prevalence of 1% in acute stroke (Ghika-Schmid *et al.*, 1997). In addition, those hyperkinetic movement disorders seem to be related to an ischaemic lesion in the basal ganglia or thalamic nuclei in the majority of patients (Ghika-Schmid *et al.*, 1997; Kim, 2001), whereas a specific location of cerebral ischaemia in patients with limb-shaking has not been found thus far.

Previous studies concluded that limb-shaking TIAs are likely to be caused by a low flow state of the brain and not by emboli, based on diminished vasomotor reactivity by TCD (Tatemichi *et al.*, 1990; Baumgartner and Baumgartner, 1998; Niehaus *et al.*, 1998) and cerebral blood flow by Xenon inhalation (Yanagihara *et al.*, 1985; Tatemichi *et al.*, 1990). However, of patients with ICA occlusion in general, 12% had an exhausted and 29% a diminished CO<sub>2</sub>-reactivity when investigated by TCD

**Table 3** Comparison of collateral blood flow pathways and TCD CO<sub>2</sub>-reactivity between patients with ICA occlusion with (n = 34) and without (n = 68) limb-shaking

|                                                           | Limb-shaking group (n = 34) | Control group (n = 68) | Odds ratio (95% CI)           |
|-----------------------------------------------------------|-----------------------------|------------------------|-------------------------------|
| Collateral flow via anterior communicating artery         | 18/28 (64%)                 | 44/56 (79%)            | 0.5 (0.2–1.3)                 |
| Collateral flow via posterior communicating artery        | 21/24 (88%)                 | 30/44 (68%)            | 3.3 (0.8–12.8)                |
| Collateral flow via ophthalmic artery                     | 20/30 (67%)                 | 23/52 (44%)            | 2.5 (0.99–6.4)                |
| Leptomeningeal vessels                                    | 21/25 (84%)                 | 21/48 (44%)            | 6.8 (2.0–22.7)                |
| CO <sub>2</sub> -reactivity in % <sup>a</sup> (mean ± SD) | 5 ± 16                      | 12 ± 17                | 0.97 (0.94–1.00) <sup>b</sup> |

a CO<sub>2</sub> -reactivity on the symptomatic side could be measured in 29 patients with limb-shaking and in 63 patients without limb-shaking. In three patients TCD could not be performed and we had to exclude six patients because of an absent temporal bone window and one control patient with ischaemic stroke as an outlier with a CO<sub>2</sub>-reactivity of 127%.

b CO<sub>2</sub> -reactivity is expressed as OR per 1% increase in CO<sub>2</sub>-reactivity.

(Widder *et al.*, 1994). Studies that included only symptomatic patients with an ICA occlusion found an impaired flow state of the brain in 48 to 79% of patients, irrespective of the presence of limb-shaking (Webster *et al.*, 1995; Grubb *et al.*, 1998; Vernieri *et al.*, 1999). In agreement with these studies, we found a diminished CO<sub>2</sub>-reactivity in 68% of patients without limb-shaking. The patients with limb-shaking had a relatively lower CO<sub>2</sub>-reactivity. When we restricted the analysis to patients with TIAs only, excluding patients who presented with ischaemic stroke, the lower CO<sub>2</sub>-reactivity in patients with limb-shaking TIAs became even more prominent. This may be explained by the fact that in general, patients with ischaemic stroke associated with ICA occlusion more often have a low CO<sub>2</sub>-reactivity than patients with TIAs (Vernieri *et al.*, 1999). Since most patients with limb-shaking TIAs had recurrent episodes of symptoms, their time interval between the last TIA and the TCD was shorter than for the patients without limb-shaking. In some patients CO<sub>2</sub>-reactivity improves spontaneously over time (Widder *et al.*, 1994), and therefore we adjusted for the time interval between the last symptoms and TCD. This analysis showed that a short time period since the last TIA contributes to the relatively low CO<sub>2</sub>-reactivity in patients with limb-shaking.

Another important finding was that patients with limb-shaking more often had leptomeningeal collaterals than patients with ICA occlusion without limb-shaking. Several previous studies have shown that leptomeningeal collaterals were more often present in patients with a low cerebral blood flow (Powers *et al.*, 1987) or impaired cerebrovascular reactivity (Smith *et al.*, 1994; Muller and Schimrigk, 1996; Hofmeijer *et al.*, 2002) compared with patients without haemodynamic compromise, whereas one study of 17 patients with an increased oxygen extraction fraction and 30 patients with a normal oxygen extraction fraction found that the pattern of collaterals was not associated with an increased oxygen extraction fraction (Derdeyn *et al.*, 1999b). However, in this study only two patients had pial leptomeningeal collaterals (retrograde filling of MCA branches to the level of the insula). Both of these two patients had an increased oxygen extraction fraction. Another study showed that the presence of collateral flow by the ophthalmic artery or leptomeningeal vessels was significantly associated with an increased oxygen extraction fraction, but that this relationship was confounded by the presence of cerebral infarcts (Yamauchi *et al.*, 2004). Although the role of leptomeningeal

collaterals in the flow state of the brain needs further investigation (Brozici *et al.*, 2003; Liebeskind, 2003), we suggest that the finding of leptomeningeal collaterals in the majority of patients with limb-shaking supports the haemodynamic origin of limb-shaking TIAs. Because of the relationship between leptomeningeal collaterals and cerebrovascular reactivity (Smith *et al.*, 1994; Muller and Schimrigk, 1996; Hofmeijer *et al.*, 2002), we included both variables in a multivariable model and showed that the presence of leptomeningeal collaterals was independently associated with the presence of limb-shaking, and we still found a trend for a lower CO<sub>2</sub>-reactivity in patients with limb-shaking.

Theoretically, patients with limb-shaking TIAs could benefit from treatment aimed at improving the cerebral perfusion. A few small case series described a decreased frequency or complete cessation of limb-shaking TIAs after EC/IC bypass or carotid endarterectomy (Baqis *et al.*, 1985; Yanagihara *et al.*, 1985; Tatemichi *et al.*, 1990; Baumgartner and Baumgartner, 1998). The preliminary results of the Japanese EC/IC Bypass Trial (JET Study Group, 2002) showed a just significantly ( $P=0.046$ ) lower incidence of recurrent stroke in patients with symptomatic ICA or MCA stenosis or occlusion and haemodynamic compromise who underwent EC/IC bypass surgery in comparison with medically treated patients, but definite results have not yet been published in the English literature. The results of the Carotid Occlusion Surgery Study (Grubb *et al.*, 2003), which investigates the beneficial effect of superficial temporal artery/MCA bypass surgery in patients with a symptomatic ICA occlusion and an increased oxygen extraction fraction, are expected in 2014.

This study has some limitations. First, we do not have clinical follow-up data of all patients with symptomatic ICA occlusion. As a result, we could not determine the predictive value of the presence of limb-shaking for the risk of recurrent ischaemic stroke. Since limb-shaking is an uncommon feature that may be difficult to diagnose, reliable information on the long-term outcome of patients with limb-shaking is difficult to obtain. Second, we measured the haemodynamic state of the brain indirectly by TCD CO<sub>2</sub>-reactivity, and measurement of the haemodynamic state of the brain, including oxygen extraction fraction, by means of <sup>15</sup>O-PET studies would have provided valuable additional information (Derdeyn *et al.*, 1999a). Third, we may have underestimated the presence of deep watershed ischaemic lesions as seven patients did not have an MRI but a CT instead. In addition,

we only classified the symptomatic infarcts, whereas patients with ICA occlusion often have asymptomatic ischaemic lesions in the deep watershed area.

Fourth, the current study inevitably had some element of retrospective ascertainment of the data, as it was not yet designed at the beginning of the prospectively collected series of patients with a symptomatic ICA occlusion. Fifth, we did not perform an inter-observer study with respect to the clinical diagnosis of limb-shaking. This might have influenced the frequency of limb-shaking in our series, although we strictly defined the criteria for this diagnosis before inclusion of patients. Finally, we did not perform EEG in all patients to confirm the absence of epileptic discharges at the time of limb-shaking.

In conclusion, we have further characterized the clinical features of limb-shaking TIAs that may improve their recognition by clinicians. Our results indicate that patients with an ICA occlusion and limb-shaking have a particularly impaired flow state of the brain compared with patients with ICA occlusion without limb-shaking. Whether the presence of a simple clinical feature such as limb-shaking can be used to identify the patient who might benefit from a revascularization procedure remains to be determined.

## Acknowledgements

The authors thank Professor L.R. Caplan, MD, Beth Israel Deaconess Medical Centre, Boston, USA, for his valuable comments on an earlier version of this manuscript.

## Funding

Netherlands Heart Association (grant number 2003B263 to S.P.); Netherlands Organization for Health Research and Development (grant number 907-00-103 to C.J.M.K.).

## References

- Banks JL, Marotta CA. Outcomes validity and reliability of the modified Rankin scale: implications for stroke clinical trials: a literature review and synthesis. *Stroke* 2007; 38: 1091–6.
- Baquis GD, Pessin MS, Scott RM. Limb shaking – a carotid TIA. *Stroke* 1985; 16: 444–8.
- Baumgartner RW, Baumgartner I. Vasomotor reactivity is exhausted in transient ischaemic attacks with limb shaking. *J Neurol Neurosurg Psychiatry* 1998; 65: 561–4.
- Bogousslavsky J, Regli F. Unilateral watershed cerebral infarcts. *Neurology* 1986; 36: 373–7.
- Brozici M, van der Zwan A, Hillen B. Anatomy and functionality of leptomeningeal anastomoses: a review. *Stroke* 2003; 34: 2750–62.
- Cheshire WP Jr, Meschia JF. Postprandial limb-shaking: an unusual presentation of transient cerebral ischemia. *Clin Auton Res* 2006; 16: 243–6.
- Damasio H. A computed tomographic guide to the identification of cerebral vascular territories. *Arch Neurol* 1983; 40: 138–42.
- Derdeyn CP, Grubb RL Jr, Powers WJ. Cerebral hemodynamic impairment: methods of measurement and association with stroke risk. *Neurology* 1999a; 53: 251–9.
- Derdeyn CP, Shaibani A, Moran CJ, Cross DT, Grubb RL Jr, Powers WJ. Lack of correlation between pattern of collateralization and misery perfusion in patients with carotid occlusion. *Stroke* 1999b; 30: 1025–32.
- Firlik AD, Firlik KS, Yonas H. Physiological diagnosis and surgical treatment of recurrent limb shaking: case report. *Neurosurgery* 1996; 39: 607–11.
- Fisher CM. Concerning recurrent transient cerebral ischemic attacks. *Can Med Assoc J* 1962; 86: 1091–9.
- Fox AJ. How to measure carotid stenosis. *Radiology* 1993; 186: 316–8.
- Garrett MC, Komotar RJ, Starke RM, Merkow MB, Otten ML, Sciacca RL, et al. The efficacy of direct extracranial-intracranial bypass in the treatment of symptomatic hemodynamic failure secondary to athero-occlusive disease: a systematic review. *Clin Neurol Neurosurg* 2009; 111: 319–26.
- Ghika-Schmid F, Ghika J, Regli F, Bogousslavsky J. Hyperkinetic movement disorders during and after acute stroke: the Lausanne Stroke Registry. *J Neurol Sci* 1997; 146: 109–16.
- Grubb RL Jr, Derdeyn CP, Fritsch SM, Carpenter DA, Yundt KD, Videen TO, et al. Importance of hemodynamic factors in the prognosis of symptomatic carotid occlusion. *JAMA* 1998; 280: 1055–60.
- Grubb RL Jr, Powers WJ, Derdeyn CP, Adams HP Jr, Clarke WR. The carotid occlusion surgery study. *Neurosurg Focus* 2003; 14: e9.
- Hofmeijer J, Klijn CJ, Kappelle LJ, van Huffelen AC, van Gijn J. Collateral circulation via the ophthalmic artery or leptomeningeal vessels is associated with impaired cerebral vasoreactivity in patients with symptomatic carotid artery occlusion. *Cerebrovasc Dis* 2002; 14: 22–6.
- JET Study Group. Japanese EC-IC Bypass Trial: The second interim analysis (in Japanese). *Surg Cereb Stroke* 2002; 30: 434–7.
- Kiechl S, Furtner M, Knoflach M, Werner P, Willeit J. Kaleidoscopic vision and a jerking leg on the ski slope. *Lancet* 2007; 370: 1878.
- Kim JS. Delayed onset mixed involuntary movements after thalamic stroke: clinical, radiological and pathophysiological findings. *Brain* 2001; 124: 299–309.
- Klempen NL, Janardhan V, Schwartz RB, Stieg PE. Shaking limb transient ischemic attacks: unusual presentation of carotid artery occlusive disease: report of two cases. *Neurosurgery* 2002; 51: 483–7.
- Klijn CJ, Kappelle LJ, van der Grond J, Visser GH, Algra A, Tulleken CA, et al. Lack of evidence for a poor haemodynamic or metabolic state of the brain in patients with haemodynamic clinical features associated with carotid artery occlusion. *Cerebrovasc Dis* 2001; 12: 99–107.
- Klijn CJ, Kappelle LJ, van Huffelen AC, Visser GH, Algra A, Tulleken CA, et al. Recurrent ischemia in symptomatic carotid occlusion: prognostic value of hemodynamic factors. *Neurology* 2000; 55: 1806–12.
- Leira EC, Ajax T, Adams HP Jr. Limb-shaking carotid transient ischemic attacks successfully treated with modification of the antihypertensive regimen. *Arch Neurol* 1997; 54: 904–5.
- Levine RL, Lagreze HL, Dobkin JA, Hanson HM, Satter MR, Rowe BR, et al. Cerebral vasocapacitance and TIAs. *Neurology* 1989; 39: 25–9.
- Liebeskind DS. Collateral circulation. *Stroke* 2003; 34: 2279–84.
- Muller M, Schimrigk K. Vasomotor reactivity and pattern of collateral blood flow in severe occlusive carotid artery disease. *Stroke* 1996; 27: 296–9.
- Niehaus L, Neuhauser H, Meyer BU. Transient visual blurring, retro-orbital pain and repetitive involuntary movements in unilateral carotid artery occlusion. *Clin Neurol Neurosurg* 1998; 100: 31–2.
- Powers WJ, Press GA, Grubb RL Jr, Gado M, Raichle ME. The effect of hemodynamically significant carotid artery disease on the hemodynamic status of the cerebral circulation. *Ann Intern Med* 1987; 106: 27–34.
- Salah Uddin AB. Limb shaking transient ischemic attack – an unusual presentation of carotid occlusive disease. A case report and review of the literature. *Parkinsonism Relat Disord* 2004; 10: 451–3.
- Schulz UG, Rothwell PM. Transient ischaemic attacks mimicking focal motor seizures. *Postgrad Med J* 2002; 78: 246–7.
- Shimizu T, Hiroki M, Yamaoka Y, Kato S, Suda M, Ide K, et al. Alternating paroxysmal hemiballism-hemichorea in bilateral internal carotid artery stenosis. *Intern Med* 2001; 40: 808–12.

- Smith HA, Thompson-Dobkin J, Yonas H, Flint E. Correlation of xenon-enhanced computed tomography-defined cerebral blood flow reactivity and collateral flow patterns. *Stroke* 1994; 25: 1784–7.
- Tatemichi TK, Young WL, Prohovnik I, Gitelman DR, Correll JW, Mohr JP. Perfusion insufficiency in limb-shaking transient ischemic attacks. *Stroke* 1990; 21: 341–7.
- The EC/IC Bypass Study Group. Failure of extracranial-intracranial arterial bypass to reduce the risk of ischemic stroke. Results of an international randomized trial. *N Engl J Med* 1985; 313: 1191–1200.
- Vernieri F, Pasqualetti P, Passarelli F, Rossini PM, Silvestrini M. Outcome of carotid artery occlusion is predicted by cerebrovascular reactivity. *Stroke* 1999; 30: 593–8.
- Webster MW, Makaroun MS, Steed DL, Smith HA, Johnson DW, Yonas H. Compromised cerebral blood flow reactivity is a predictor of stroke in patients with symptomatic carotid artery occlusive disease. *J Vasc Surg* 1995; 21: 338–44.
- Widder B, Kleiser B, Krapf H. Course of cerebrovascular reactivity in patients with carotid artery occlusions. *Stroke* 1994; 25: 1963–7.
- Yamauchi H, Kudoh T, Sugimoto K, Takahashi M, Kishibe Y, Okazawa H. Pattern of collaterals, type of infarcts, and haemodynamic impairment in carotid artery occlusion. *J Neurol Neurosurg Psychiatry* 2004; 75: 1697–1701.
- Yanagihara T, Piepgras DG, Klass DW. Repetitive involuntary movement associated with episodic cerebral ischemia. *Ann Neurol* 1985; 18: 244–50.
- Zaidat OO, Werz MA, Landis DM, Selman W. Orthostatic limb shaking from carotid hypoperfusion. *Neurology* 1999; 53: 650–1.
